# Supplementary material for: A Statistical Framework to Identify Cell Types Whose Genetically Regulated Proportions are Associated with Complex Diseases
Source: Research Square preprint supplement (doi:10.21203/rs.3.rs-275314/v1), 2021-03-10
Supplement: Supplementary file 1 [file 7e53d8a737c9f595685d20af.xlsx]

## Sheet: Sheet1
Tissues used from HCL dataset
Adult tissues
HCL	GTEx
Adipose	Adipose_Subcutaneous
Adrenal-Gland	Adrenal-Gland
Artery	Artery_Aorta
Cerebellum	Brain_Cerebellum
Artery	Artery_Coronary
Artery	Artery_Tibial
Colon	Colon_Sigmoid
Colon	Colon_Transverse
Esophagus	Esophagus_Gastroesophageal_Junction
Esophagus	Esophagus_Mucosa
Esophagus	Esophagus_Muscularis
Heart	Heart_Atrial_Appendage
Heart	Heart_Left_Ventricle
Liver	Liver
Muscle	Muscle_Skeletal
Pancreas	Pancreas
Peripheral-Blood	Whole_Blood
Prostate	Prostate
Spleen	Spleen
Stomach	Stomach
Thyroid	Thyroid
Transverse-Colon	Colon_Transverse
Uterus	Uterus
Fetal tissues
Brain	Brain_Amygdala
Brain	Brain_Anterior_cingulate_cortex_BA24
Brain	Brain_Caudate_basal_ganglia
Brain	Brain_Cerebellar_Hemisphere
Brain	Brain_Cerebellum
Brain	Brain_Cortex
Brain	Brain_Frontal_Cortex_BA9
Brain	Brain_Hippocampus
Brain	Brain_Hypothalamus
Brain	Brain_Nucleus_accumbens_basal_ganglia
Brain	Brain_Putamen_basal_ganglia
Brain	Brain_Spinal_cord_cervical_c-1
Brain	Brain_Substantia_nigra
